# Supplementary material for: Acteoside: a novel green inhibitor for the corrosion of copper in 1.0 M HNO3 solution: experimental and theoretical investigation
Source: Royal Society of Chemistry journal article supplement (doi:10.1039/d5ra01657f), 2025-01-01

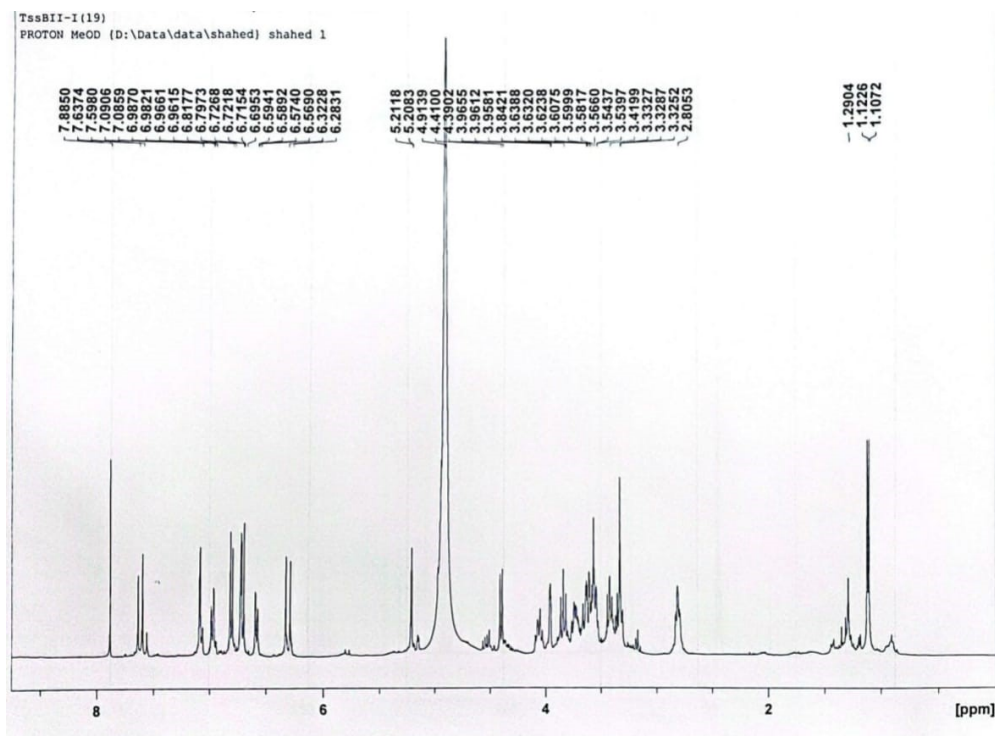

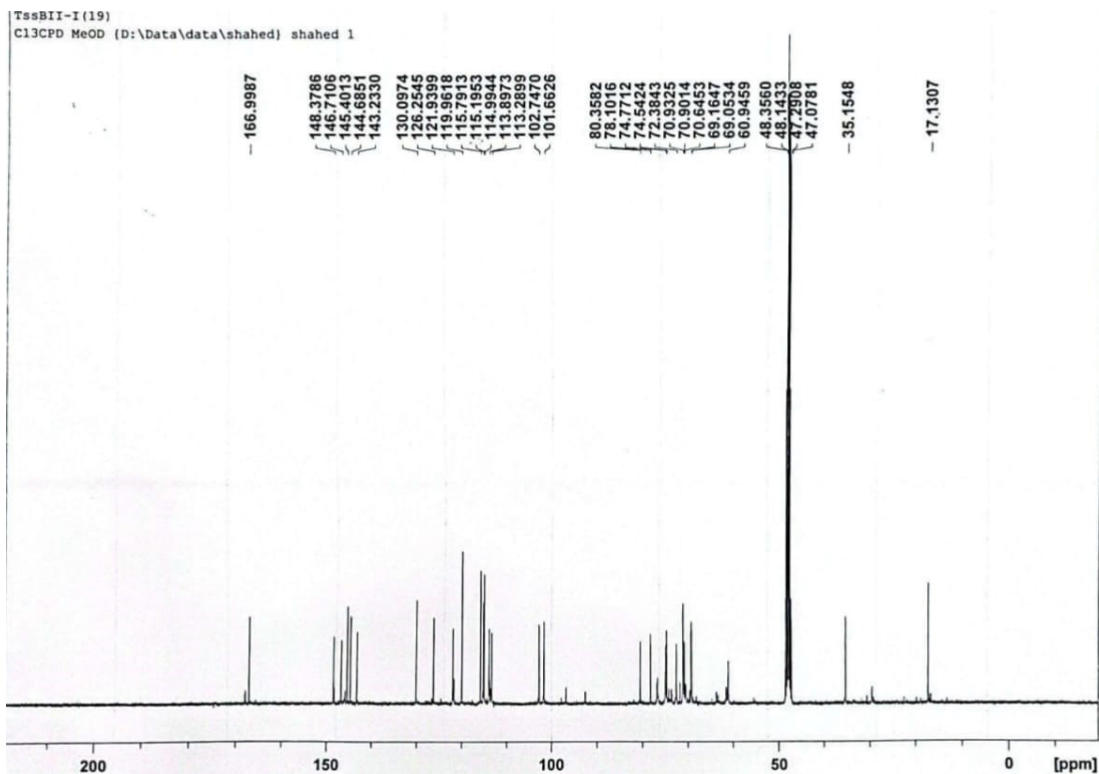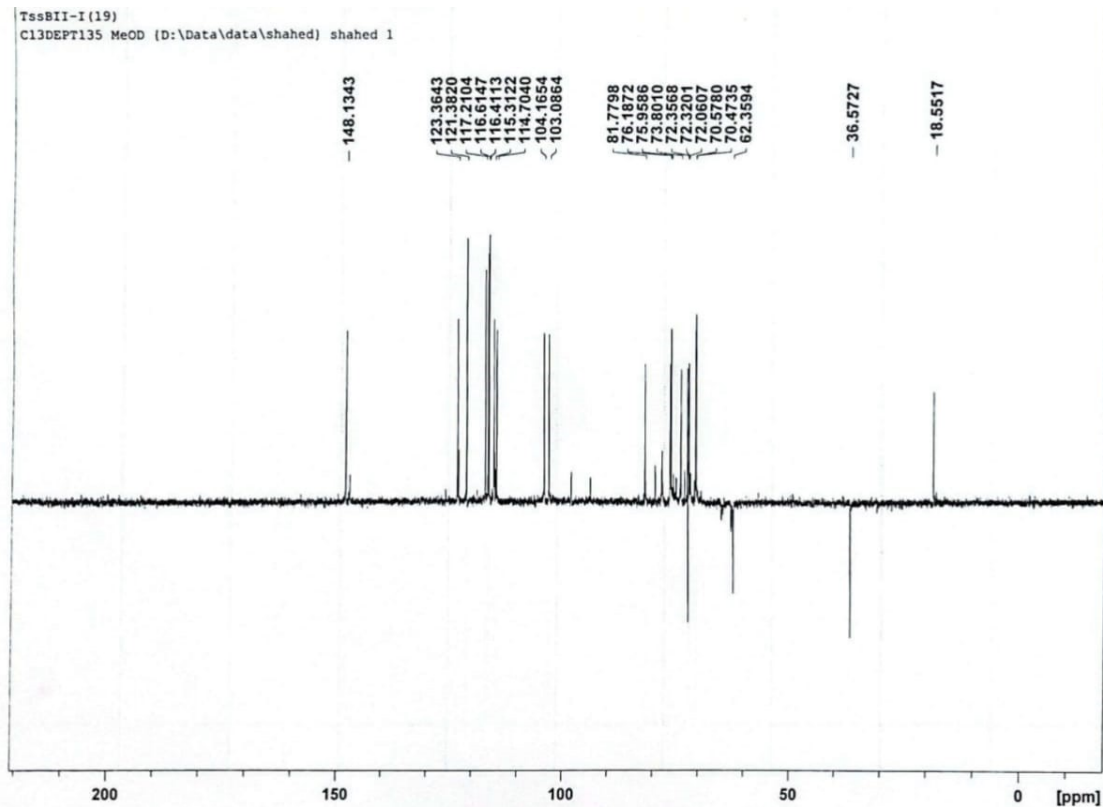

test  
C13DEPT90 MeOD (D:\Data\data\shahed) shahed 1

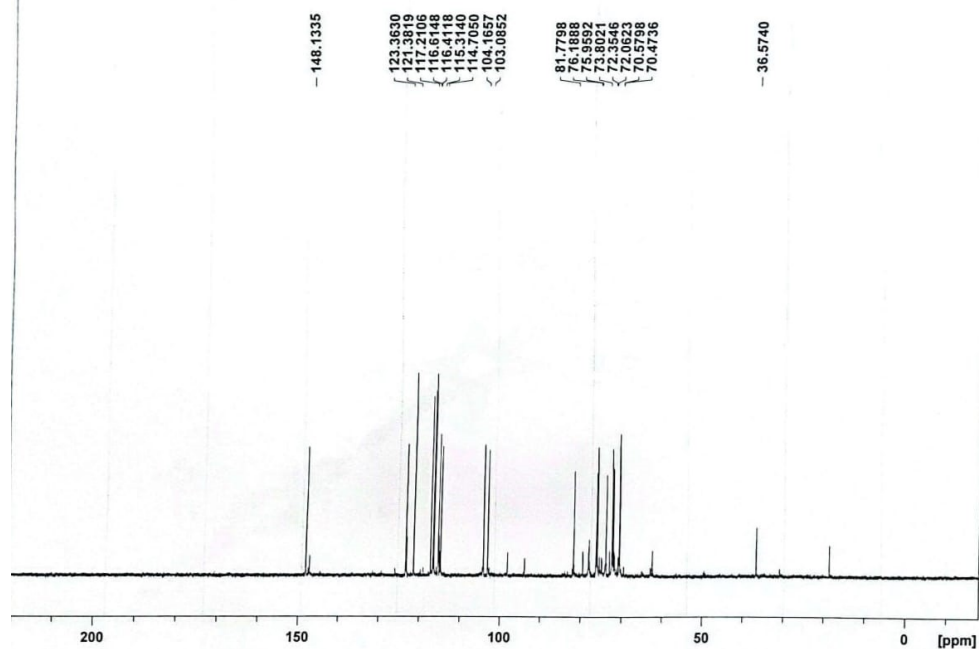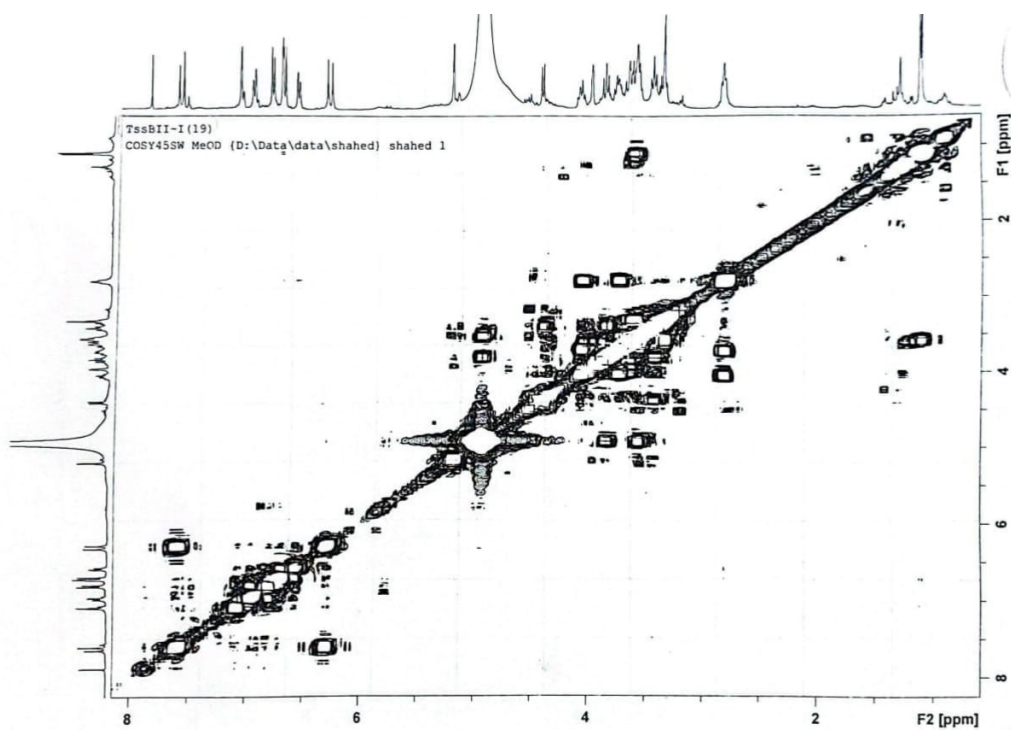

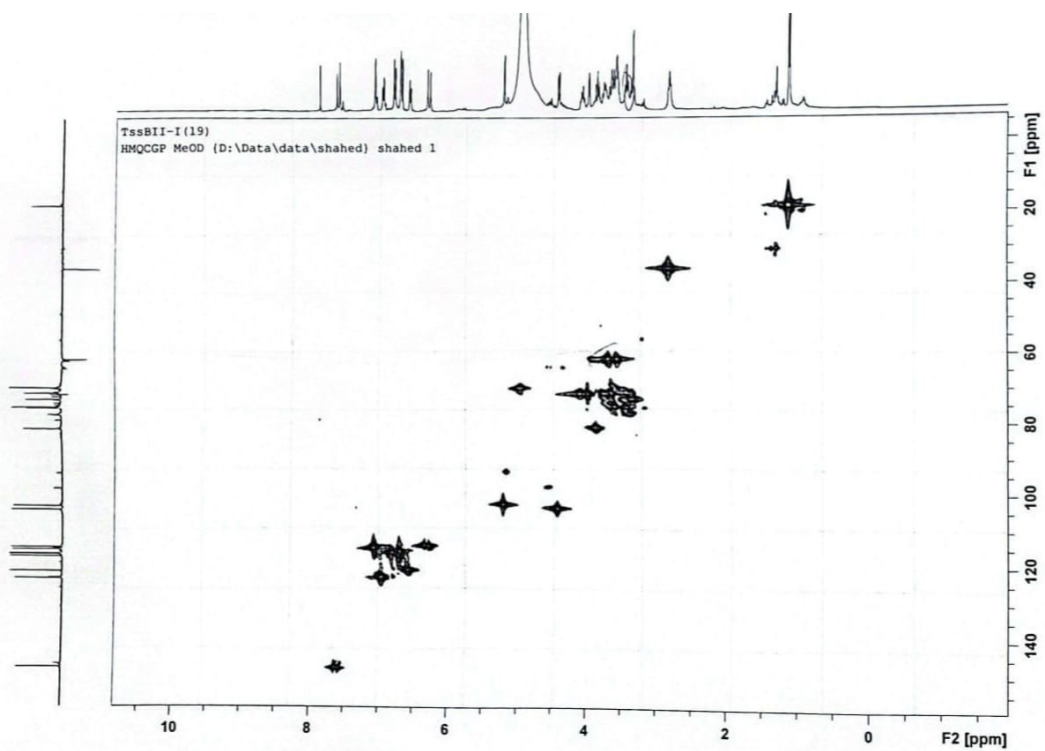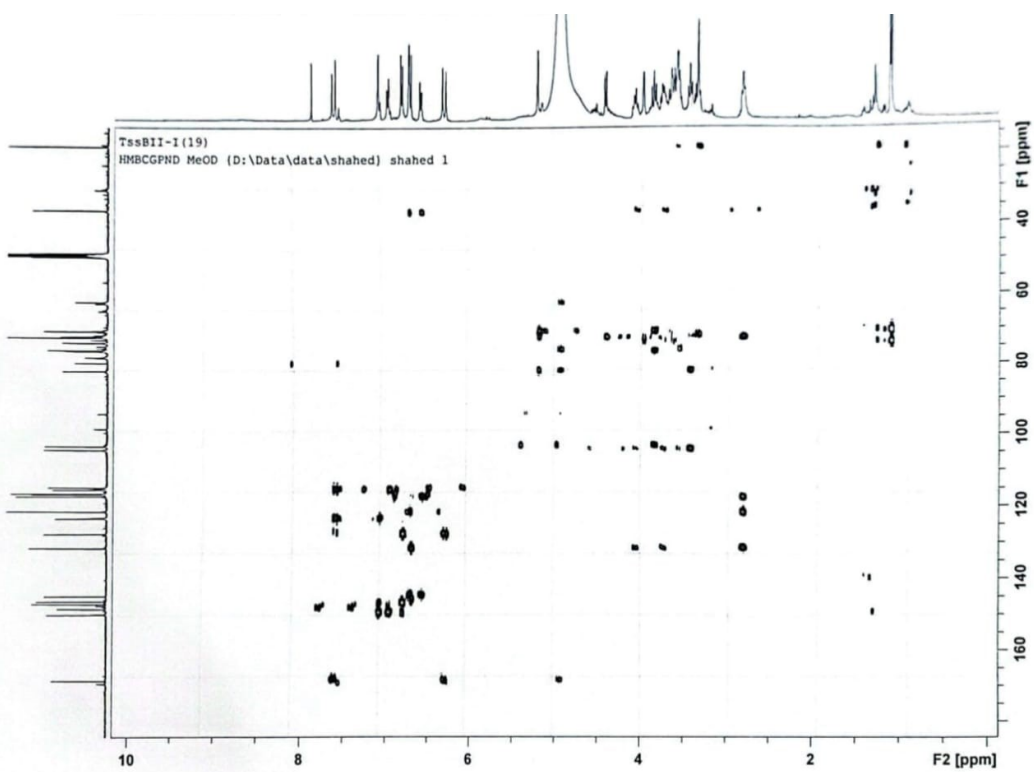

Supplement: d5ra01657f1.pdf [file d5ra01657f1.pdf]
